# Supplementary figures and images for: Long-term galsulfase enzyme replacement therapy in Taiwanese mucopolysaccharidosis VI patients: A case series
Source: PubMed Central journal article supplement — Mol Genet Metab Rep. 2016 Apr 18;7:63–9. doi: 10.1016/j.ymgmr.2016.04.003 (PMC4834679; doi:10.1016/j.ymgmr.2016.04.003), 2016-04-18

**Figure S1**

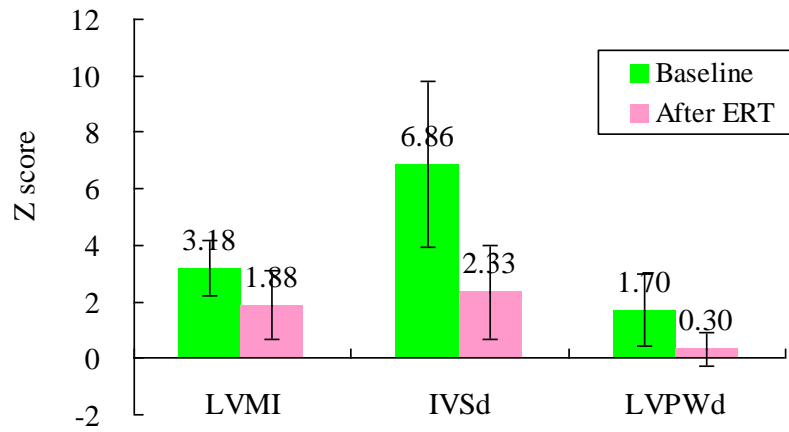

**Figure S2**

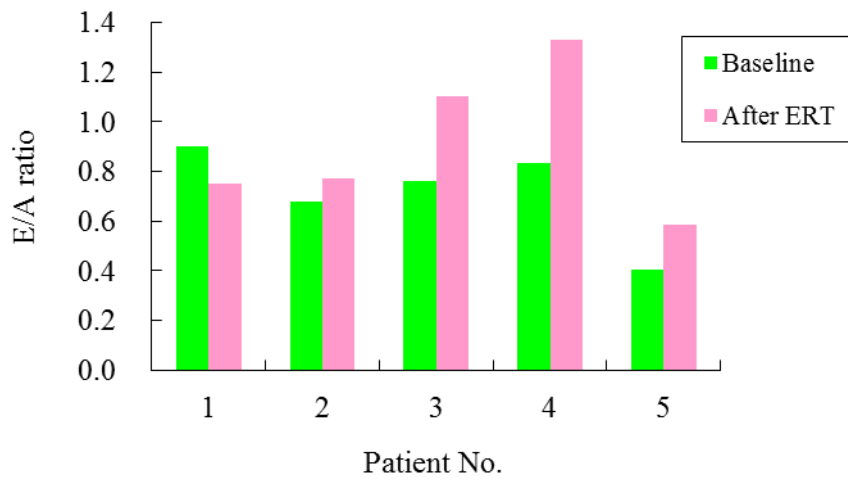

**Figure S3**

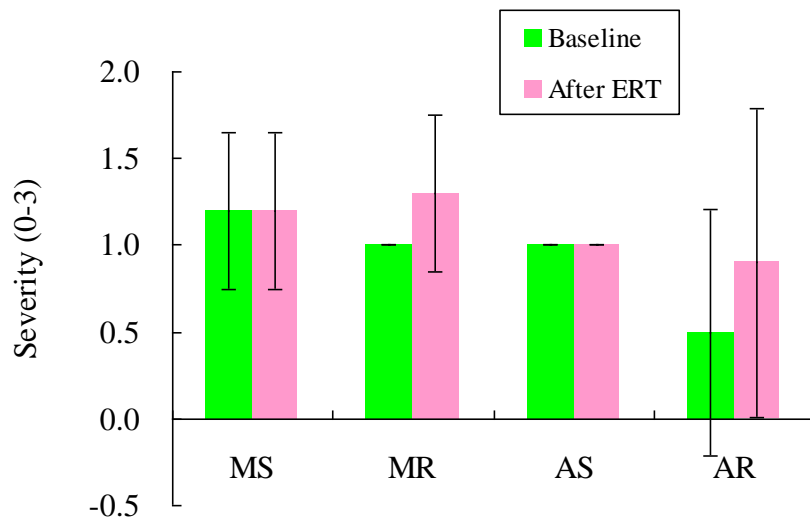

**Figure S4**

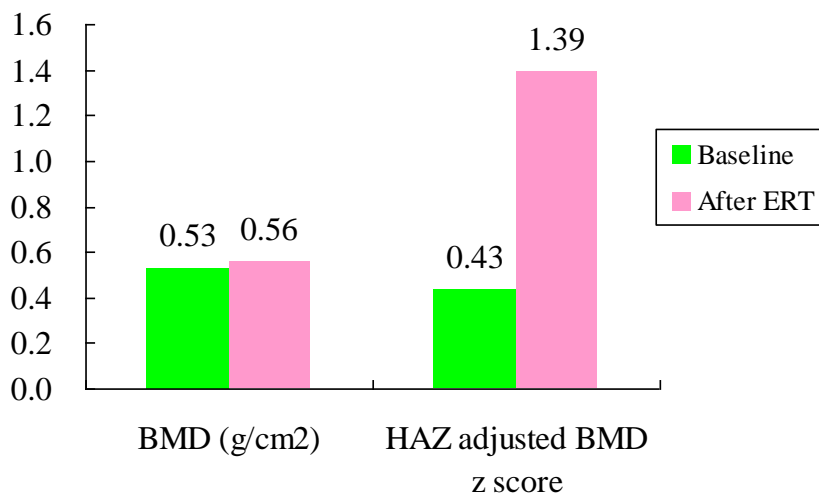

**Figure S5**

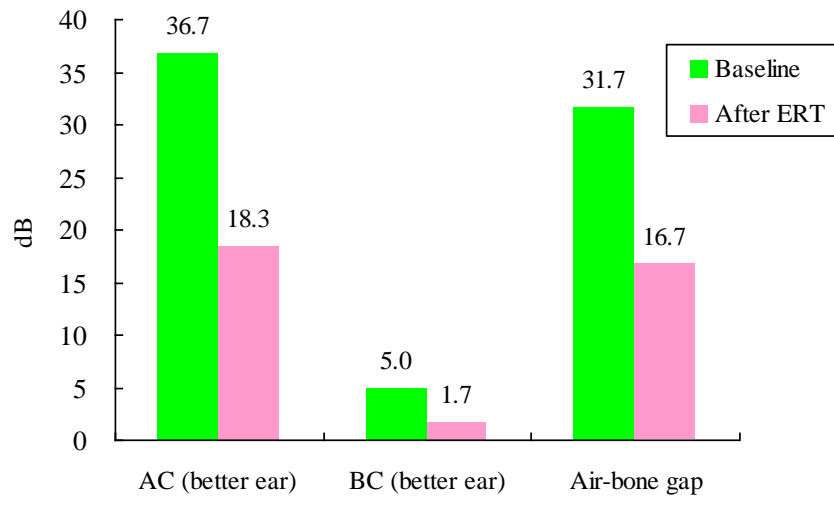

Supplement: mmc1.pdf [file mmc1.pdf]
